# Supplementary material for: One-year results and the change of vascular morphology of retinal-retinal anastomosis in patients with type 3 macular neovascularization after intravitreal administration of faricimab in the “treat and extend, then fix” regimen
Source: Research Square preprint supplement (doi:10.21203/rs.3.rs-5829635/v1), 2025-01-24
Supplement: Supplementary file 1 [file 582b255d75156155bfe42c8e.xlsx]

## Sheet: Faricimab RAP
Case No.	age	Gender	Eye	Type 3 MNV stage	RPD	RRA	CME	Disappearance (W)	SRD	Disappearance (W)	PED	Disappearance (W)	Dry macula	Normalization by OCTA	No. Injections	Interval of injections (W)	RPE atrophy at baseline	RPE atrophy involving the fovea		Baseline VA(LOG)	VA log 1M	VA log 2M	VA log 4M	VA log 6M	VA log 12M		CRT_Baseline	1M	2M	4M	6M	12M		SFCT_Baseline	1M	2M	4M	6M	12M
1	78	F	Left	2	+	Yes	1	4	0	NA	-	NA	Yes	Yes	6	12	0	No		0.39794	0.09691	0.154902	0	0.221849	0.30103		294	172	159	139	126	143		149	123	128	120	123	79
2	77	F	Left	4	+	Yes	1	8	1	4	+	8	Yes	unclear	6	12	1	No		3	3	2	2	2	2		840	554	390	147	128	91		71	91	77	51	60	45
3	78	F	Right	3	+	Yes	1	4	0	NA	+	4	Yes	Yes	6	12	0	No		0.30103	0.30103	0.30103	0.522879	0.39794	0.522879		408	188	138	121	146	101		248	201	193	180	167	192
4	80	M	Left	2	+	Yes	1	8	0	NA	-	NA	Yes	Yes	6	12	0	Yes		0.69897	0.39794	0.39794	0.39794	0.30103	0.39794		493	206	204	163	167	125		197	164	167	143	142	136
5	88	M	Right	2	+	Yes	1	4	0	NA	-	NA	Yes	Yes	6	12	0	No		1.09691	0.69897	0.823909	0.522879	0.39794	0.221849		643	201	171	158	162	147		101	100	77	75	69	62
6	74	F	Left	2	+	Yes	1	4	1	4	-	NA	Yes	Yes	6	12	0	Yes		0.30103	0.30103	0.221849	0.30103	0.522879	0.39794		290	183	146	146	110	105		120	118	100	73	75	83
7	91	F	Right	3	+	Yes	1	4	1	4	+	4	Yes	Yes	6	12	0	No		1.09691	1	1	0.69897	0.69897	0.39794		463	196	183	183	151	126		188	154	140	140	138	96
8	77	F	Right	3	+	Yes	1	4	0	NA	+	4	Yes	Yes	6	12	1	No		1.09691	1	0.69897	1	0.823909	1		398	269	231	210	221	221		229	205	201	188	213	171
9			Left	3	+	Yes	1	4	1	4	+	4	Yes	Yes	6	12	0	Yes		1.09691	1.09691	1.30103	1.39794	1	1		440	191	171	144	152	150		210	185	189	181	170	133
10	83	F	Right	2	+	Yes	1	4	0	NA	-	NA	Yes	Yes	6	12	0	No		0.823909	0.39794	0.39794	0.30103	0.221849	0.221849		481	120	98	152	98	98		150	116	115	98	87	87
11			Left	2	+	Yes	1	4	0	NA	-	NA	Yes	Yes	6	12	0	No		1	0.221849	0.39794	0.30103	0.522879	0.522879		288	155	116	146	158	158		140	125	108	108	113	93
12	85	F	Right	3	+	Yes	1	4	0	NA	+	4	Yes	Yes	6	12	0	No		0.39794	0.39794	0.221849	0.221849	0.154902	0.154902		430	176	170	136	136	136		156	143	136	118	125	118
	F = female; M = male; MNV = macular neovascularization ; RPD = reticular pseudodrusen; RRA = retinal-retinal anastomosis; CME = cystoid macular edema; W = week; SRD = serous retinal detachment; NA = not applicable; PED = retinal pigment epithelial detachment; OCTA = optical coherence tomography angiography; RPE = retinal pigmented epithelium; VA = decimal visual acuity; 12M= 12M months after trea…
